# Supplementary material
Source: HighWire-hosted journal article supplement (https://oem.bmj.com/content/oemed-2018-105454)
Supplement: inline-supplementary-material-1 [file inline-supplementary-material-1.pdf]

## Supplement 1. Data-base specific search terms

### *Database 1: Medline (OVID)*

1. Adolescent/
2. (college? adj3 (age? or graduat\$ or senior?)).ti,ab.
3. early adult?.ti,ab.
4. emerging adult?.ti,ab.
5. emergent adult?.ti,ab.
6. "generation y".ti,ab.
7. (high school\$ adj3 (age? or graduat\$ or senior?)).ti,ab.
8. millennial?.ti,ab.
9. new worker?.ti,ab.
10. student?.ti,ab.
11. exp Students/
12. teen?.ti,ab.
13. (universit\$ adj3 (age? or graduat\$ or senior?)).ti,ab.
14. Young Adult/
15. young adult?.ti,ab.
16. young people.ti,ab.
17. young student?.ti,ab.
18. youth.ti,ab.
19. or/1-18
20. Acquired Immunodeficiency Syndrome/
21. acquired immunodeficiency syndrome.ti,ab.
22. addiction?.ti,ab.
23. alcoholi\$.ti,ab.
24. amputee?.ti,ab.

25. Amputees/
26. exp Anxiety Disorders/
27. anxiety.ti,ab.
28. arthriti\$.ti,ab.
29. Arthritis/
30. Arthritis, Rheumatoid/
31. Attention Deficit Disorder with Hyperactivity/
32. attention deficit disorder.ti,ab.
33. ADHD.ti,ab.
34. Autism Spectrum Disorder/
35. Autistic Disorder/
36. autistic.ti,ab.
37. autism.ti,ab.
38. Back Pain/
39. Low Back Pain/
40. back pain.ti,ab.
41. Behavior, Addictive/
42. exp Blindness/
43. exp Brain Concussion/
44. Brain Injuries, Traumatic/
45. cancer\$.ti,ab.
46. exp Cardiovascular Diseases/
47. (chronic adj3 disease?).ti,ab.
48. (chronic adj3 health).ti,ab.
49. (chronic adj3 illness\$.ti,ab.
50. (chronic adj3 pain?).ti,ab.
51. chronic condition?.ti,ab.
52. Chronic Disease/

53. Chronic Pain/
54. concussion?.ti,ab.
55. deaf\$.ti,ab.
56. Deafness/
57. depression.ti,ab.
58. Depression/
59. Depressive Disorders/
60. Developmental Disabilities/
61. Diabetes Mellitus, Type 1/
62. Diabetes Mellitus, Type 2/
63. diabet\$.ti,ab.
64. differently abled.ti,ab.
65. disabilit\$.ti,ab.
66. disabled.ti,ab.
67. Disabled Children/
68. Disabled Persons/
69. down syndrome.ti,ab.
70. Down Syndrome/
71. drug abuse\$.ti,ab.
72. dyslexi\$.ti,ab.
73. Dyslexia/
74. Epilepsy/
75. epilepsy.ti,ab.
76. epileptic?.ti,ab.
77. exp Headache Disorders/
78. headache?.ti,ab.
79. exp Hearing Disorders/
80. hearing impair\$.ti,ab.

81. exp Heart Diseases/
82. Human immunodeficiency virus.ti,ab.
83. exp HIV/
84. HIV.ti,ab.
85. exp Intellectual Disability/
86. learning disabilit\$.ti,ab.
87. learning disorder?.ti,ab.
88. Learning Disorders/
89. Mental Disorders/
90. mental\$ ill\$.ti,ab.
91. Mentally Disabled Persons/
92. Mentally Ill Persons/
93. exp Migraine Disorders/
94. mobility issues.ti,ab.
95. mobility problem?.ti,ab.
96. Multiple Chronic Conditions/
97. multiple sclerosis.ti,ab.
98. exp Multiple Sclerosis/
99. Musculoskeletal Pain/
100. musculoskeletal pain?.ti,ab.
101. Neck pain/
102. neck pain?.ti,ab.
103. Neoplasms/
104. exp neoplasms by site/
105. exp Nervous System Diseases/
106. neurological disorder?.ti,ab.
107. obesity/
108. obesity.ti,ab.

109. obese.ti,ab.
110. exp Osteoarthritis/
111. osteoarthritis.ti,ab.
112. Pain/ and (chronic or persistent or recur\$.ti,ab.
113. Persons With Hearing Impairments/
114. exp Respiration Disorders/
115. Sensation Disorders/
116. special need?.ti,ab.
117. spinal cord injur\$.ti,ab.
118. exp Spinal Cord Injuries/
119. exp Substance-Related Disorders/
120. traumatic brain injur\$.ti,ab.
121. exp Vision Disorders/
122. visual\$ impair\$.ti,ab.
123. Visually Impaired Persons/
124. or/20-123
125. Architectural Accessibility/
126. career advice.ti,ab.
127. career counseling.ti,ab.
128. Communication Aids for Disabled/
129. co-operative education.ti,ab.
130. coach\$.ti,ab.
131. (disclos\$ adj2 support\$.ti,ab.
132. (disability adj2 culture).ti,ab.
133. "duty to accommodate".ti,ab.
134. Employee Performance Appraisal/
135. (employment adj3 (ready or readiness)).ti,ab.
136. (employment adj3 equit\$.ti,ab.

137. (employment adj3 support\$).ti,ab.
138. (employment adj3 transition\$).ti,ab.
139. employment policies.ti,ab.
140. employment policy.ti,ab.
141. employment program\$.ti,ab.
142. Employment Supported/
143. (flexib\$ adj2 work\$).ti,ab.
144. (flexib\$ adj2 hour?).ti,ab.
145. (flexib\$ adj2 shift\$).ti,ab.
146. graduation plan\$.ti,ab.
147. (government adj5 subsid\$).ti,ab.
148. Internship, Nonmedical/
149. (intervention\$ adj3 (study or design)).ti,ab.
150. (interview\$ adj2 support\$).ti,ab.
151. (interview\$ adj2 mock).ti,ab.
152. mentor\$.ti,ab.
153. Mentoring/
154. (occupation\$ adj3 (ready or readiness)).ti,ab.
155. organi#ational policies.ti,ab.
156. organi#ational policy.ti,ab.
157. Organizational Culture/
158. Organizational Policy/
159. (peer? adj3 support\$).ti,ab.
160. (placement? adj5 (job? or occupation\$ or work\$)).ti,ab.
161. Policy/
162. policies.ti,ab.
163. policy.ti,ab.
164. program\$.ti,ab.

165. Rehabilitation, Vocational/
166. salary support?.ti,ab.
167. "school to work transition\$.ti,ab.
168. Self-Evaluation Programs/
169. Self-Help Devices/
170. assistive device?.ti,ab.
171. assistive tech\$.ti,ab.
172. (sensitivity adj2 (training or education)).ti,ab.
173. service learning.ti,ab.
174. skill? development.ti,ab.
175. social support/
176. social support?.ti,ab.
177. (support\$ adj3 transition\$).ti,ab.
178. Training Support/
179. (training adj2 skill?).ti,ab.
180. (transition\$ adj2 (plan or plans or planning)).ti,ab.
181. (transition\$ adj2 practice?).ti,ab.
182. (transition\$ adj2 service?).ti,ab.
183. Vocational Guidance/
184. vocational guidance.ti,ab.
185. vocational\$ readiness.ti,ab.
186. (work\$ adj3 accommodat\$).ti,ab.
187. (work\$ adj3 sociali#ation).ti,ab.
188. (work\$ adj3 transition\$).ti,ab.
- 189. or/125-188**
190. career?.ti,ab.
191. earning?.ti,ab.
192. Employment/

193. employment.ti,ab.
194. employab\$.ti,ab.
195. Employment, Supported/
196. enter\$ work\$.ti,ab.
197. (full-time adj2 (job? or employ\$ or work\$)).ti,ab.
198. (fulltime adj2 (job? or employ\$ or work\$)).ti,ab.
199. hired.ti,ab.
200. hiring.ti,ab.
201. labo?r force.ti,ab.
202. labo?r market.ti,ab.
203. (part-time adj2 (job? or employ\$ or work\$)).ti,ab.
204. (parttime adj2 (job? or employ\$ or work\$)).ti,ab.
205. precarious work\$.ti,ab.
206. (secur\$ adj2 (job? or employ\$ or work\$)).ti,ab.
207. "Salaries and Fringe Benefits"/
208. underemploy\$.ti,ab.
209. unemploy\$.ti,ab.
210. Unemployment/
211. work\$ outcomes.ti,ab.
212. (work\$ adj3 transition\$).ti,ab.
213. (work\$ adj3 participat\$).ti,ab.
214. Work/
215. work force.ti,ab.
216. workforce.ti,ab.
217. or/190-216
218. 19 and 124 and 189 and 217
219. limit 218 to (comment or editorial or letter)
220. 218 not 219



221. limit 220 to yr="2000 -Current"

*Database 2: Embase (OVID)*

1. adolescent/
2. (college? adj3 (age? or graduat\$ or senior?)).ti,ab.
3. college/
4. early adult?.ti,ab.
5. emerging adult?.ti,ab.
6. emergent adult?.ti,ab.
7. "generation y".ti,ab.
8. (high school\$ adj3 (age? or graduat\$ or senior?)).ti,ab.
9. exp high school/
10. millennial?.ti,ab.
11. new worker?.ti,ab.
12. student?.ti,ab.
13. exp student/
14. teen?.ti,ab.
15. adolescence/
16. (universit\$ adj3 (age? or graduat\$ or senior?)).ti,ab.
17. university/
18. young adult/
19. young adult?.ti,ab.
20. young people.ti,ab.
21. young student?.ti,ab.
22. youth.ti,ab.
23. juvenile/
24. or/1-23
25. acquired immune deficiency syndrome/
26. acquired immunodeficiency syndrome.ti,ab.

27. addiction?.ti,ab.
28. addiction/
29. alcoholi\$.ti,ab.
30. alcoholism/
31. amputee?.ti,ab.
32. amputee/
33. exp anxiety disorder/
34. anxiety.ti,ab.
35. arthriti\$.ti,ab.
36. exp arthritis/
37. rheumatoid arthritis/
38. attention deficit disorder/
39. attention deficit disorder.ti,ab.
40. ADHD.ti,ab.
41. exp autism/
42. autistic.ti,ab.
43. autism.ti,ab.
44. backache/
45. low back pain/
46. addictive beha\$.ti,ab.
47. back pain.ti,ab.
48. exp blindness/
49. brain concussion/
50. traumatic brain injury/
51. cancer.ti,ab.
52. exp cardiovascular disease/
53. (chronic adj3 disease?).ti,ab.
54. (chronic adj3 health).ti,ab.

55. (chronic adj3 illness\$.ti,ab.
56. (chronic adj3 pain?).ti,ab.
57. chronic condition?.ti,ab.
58. exp chronic disease/
59. chronic pain/
60. concussion?.ti,ab.
61. exp concussion/
62. deaf\$.ti,ab.
63. exp hearing impairment/
64. depression.ti,ab.
65. depression/
66. developmental disorder/
67. exp diabetes mellitus/
68. diabet\$.ti,ab.
69. differently abled.ti,ab.
70. disabilit\$.ti,ab.
71. disabled.ti,ab.
72. disabled person/
73. disabled student/
74. down syndrome.ti,ab.
75. Down syndrome/
76. drug abuse\$.ti,ab.
77. drug abuse/
78. dyslexi\$.ti,ab.
79. dyslexia/
80. exp epilepsy/
81. epilepsy.ti,ab.
82. epileptic?.ti,ab.

83. exp "headache and facial pain"/
84. headache?.ti,ab.
85. exp hearing disorder/
86. hearing impair\$.ti,ab.
87. exp hearing impairment/
88. exp heart disease/
89. Human immunodeficiency virus.ti,ab.
90. exp Human immunodeficiency virus/
91. HIV.ti,ab.
92. exp intellectual impairment/
93. learning disabilit\$.ti,ab.
94. learning disorder/
95. learning disorder?.ti,ab.
96. exp mental disease/
97. Mental Disorder?.ti,ab.
98. mental\$ ill\$.ti,ab.
99. mentally disabled person/
100. exp migraine/
101. mobility issues.ti,ab.
102. mobility problem?.ti,ab.
103. walking difficulty/
104. multiple chronic conditions/
105. multiple sclerosis.ti,ab.
106. multiple sclerosis/
107. exp musculoskeletal pain/
108. musculoskeletal pain?.ti,ab.
109. neck pain/
110. neck pain?.ti,ab.

111. neoplasm/
112. exp neoplasms subdivided by anatomical site/
113. exp neurologic disease/
114. neurological disorder?.ti,ab.
115. exp obesity/
116. obesity.ti,ab.
117. obese.ti,ab.
118. exp osteoarthritis/
119. osteoarthritis.ti,ab.
120. Pain/ and (chronic or persistent or recur\$).ti,ab.
121. hearing impaired person/
122. exp breathing disorder/
123. exp sensory dysfunction/
124. spinal cord injur\$.ti,ab.
125. exp spinal cord injury/
126. special need?.ti,ab.
127. exp drug dependence/
128. traumatic brain injur\$.ti,ab.
129. exp visual disorder/
130. visual\$ impair\$.ti,ab.
131. visually impaired person/
132. or/25-131
133. assistive device?.ti,ab.
134. assistive tech\$.ti,ab.
135. "construction work and architectural phenomena"/
136. career advice.ti,ab.
137. career counseling.ti,ab.
138. communication aid\$.ti,ab.

139. communication support\$.ti,ab.
140. co-operative education.ti,ab.
141. coach\$.ti,ab.
142. (disclos\$ adj2 support\$).ti,ab.
143. (disability adj2 culture).ti,ab.
144. "duty to accommodate".ti,ab.
145. personnel management/
146. (employment adj3 (ready or readiness)).ti,ab.
147. (employment adj3 equit\$).ti,ab.
148. (employment adj3 support\$).ti,ab.
149. (employment adj3 transition\$).ti,ab.
150. employment policies.ti,ab.
151. employment policy.ti,ab.
152. employment program\$.ti,ab.
153. supported employment/
154. (flexib\$ adj2 work\$).ti,ab.
155. (flexib\$ adj2 hour?).ti,ab.
156. (flexib\$ adj2 shift\$).ti,ab.
157. (government adj5 subsid\$).ti,ab.
158. graduation plan\$.ti,ab.
159. intervention study/
160. (interview\$ adj2 support\$).ti,ab.
161. (interview\$ adj2 mock).ti,ab.
162. mentor\$.ti,ab.
163. mentor/
164. mentoring/
165. (occupation\$ adj3 (ready or readiness)).ti,ab.
166. organi#ational policies.ti,ab.

167. organizational policy.ti,ab.
168. Organizational Culture.ti,ab.
169. organizational policy/
170. (peer? adj3 support\$.ti,ab.
171. (placement? adj5 (job? or occupation\$ or work\$)).ti,ab.
172. policy/
173. policies.ti,ab.
174. policy.ti,ab.
175. program\$.ti,ab.
176. vocational rehabilitation/
177. salary support?.ti,ab.
178. "school to work transition\$.ti,ab.
179. Self-Evaluation Program?.ti,ab.
180. Self Help Device/
181. (sensitivity adj2 (training or education)).ti,ab.
182. service learning.ti,ab.
183. skill? development.ti,ab.
184. social support/
185. social support?.ti,ab.
186. (support\$ adj3 transition\$.ti,ab.
187. training support?.ti,ab.
188. (training adj2 skill?).ti,ab.
189. (transition\$ adj2 (plan or plans or planning)).ti,ab.
190. (transition\$ adj2 practice?).ti,ab.
191. (transition\$ adj2 service?).ti,ab.
192. vocational guidance/
193. vocational guidance.ti,ab.
194. vocational readiness.ti,ab.



195. (work\$ adj3 accommodat\$).ti,ab.
196. (work\$ adj3 sociali#ation).ti,ab.
197. (work\$ adj3 transition\$).ti,ab.
198. or/135-197
199. career?.ti,ab.
200. earning?.ti,ab.
201. exp employment/
202. employment.ti,ab.
203. employab\$.ti,ab.
204. supported employment/
205. enter\$ work\$.ti,ab.
206. (full-time adj2 (employ\$ or job? or work\$)).ti,ab.
207. (fulltime adj2 (employ\$ or job? or work\$)).ti,ab.
208. hired.ti,ab.
209. hiring.ti,ab.
210. labo?r force.ti,ab.
211. labo?r market.ti,ab.
212. (part-time adj2 (job? or employ\$ or work\$)).ti,ab.
213. (parttime adj2 (job? or employ\$ or work\$)).ti,ab.
214. precarious work\$.ti,ab.
215. "salary and fringe benefit"/
216. (secur\$ adj2 (employ\$ or job? or work\$)).ti,ab.
217. underemploy\$.ti,ab.
218. unemploy\$.ti,ab.
219. unemployment/
220. work\$ outcomes.ti,ab.
221. (work\$ adj3 transition\$).ti,ab.
222. (work\$ adj3 participat\$).ti,ab.

223. work/

224. work force.ti,ab.

225. workforce.ti,ab.

226. or/199-225

227. 24 and 132 and 198 and 226

228. limit 227 to (books or "book review" or chapter or conference abstract or conference paper or "conference review" or editorial or letter)

229. 227 not 228

230 limit 229 to yr="2000 -Current"

*Database 3: PsycInfo (OVID)*

1. Adolescent?.ti,ab.
2. (college? adj3 (age? or graduat\$ or senior?)).ti,ab.
3. exp COLLEGES/
4. early adult?.ti,ab.
5. emerging adult?.ti,ab.
6. emergent adult?.ti,ab.
7. "generation y".ti,ab.
8. (high school\$ adj3 (age? or graduat\$ or senior?)).ti,ab.
9. high schools/
10. millennial?.ti,ab.
11. new worker?.ti,ab.
12. special need?.ti,ab.
13. student?.ti,ab.
14. exp students/
15. teen?.ti,ab.
16. (universit\$ adj3 (age? or graduat\$ or senior?)).ti,ab.
17. young adult?.ti,ab.
18. young people.ti,ab.
19. youth.ti,ab.
20. or/1-19
21. acquired immunodeficiency syndrome.ti,ab.
22. addiction?.ti,ab.
23. exp addiction/
24. alcoholi\$.ti,ab.
25. alcoholism/
26. amputee?.ti,ab.

27. exp anxiety disorders/
28. anxiety.ti,ab.
29. arthriti\$.ti,ab.
30. arthritis/
31. rheumatoid arthritis/
32. attention deficit disorder with hyperactivity/
33. attention deficit disorder.ti,ab.
34. ADHD.ti,ab.
35. autism spectrum disorders/
36. autistic.ti,ab.
37. autism.ti,ab.
38. back pain/
39. back pain.ti,ab.
40. Addictive beha\$.ti,ab.
41. exp blind/
42. brain concussion/
43. exp traumatic brain injury/
44. cancer.ti,ab.
45. exp neoplasms/
46. exp cardiovascular disorders/
47. (chronic adj3 disease?).ti,ab.
48. (chronic adj3 health).ti,ab.
49. (chronic adj3 illness\$.ti,ab.
50. (chronic adj3 pain?).ti,ab.
51. chronic condition?.ti,ab.
52. exp chronic illness/
53. chronic pain/
54. concussion?.ti,ab.

55. brain concussion/
56. deaf\$.ti,ab.
57. exp deaf/
58. depression.ti,ab.
59. exp MAJOR DEPRESSION/ or "DEPRESSION (EMOTION)"/
60. Depressive Disorder?.ti,ab.
61. exp developmental disabilities/
62. exp Diabetes Mellitus/ or exp Diabetes/ or Type 2 Diabetes/
63. diabet\$.ti,ab.
64. differently abled.ti,ab.
65. disabilit\$.ti,ab.
66. disabled.ti,ab.
67. Disabled Child\$.ti,ab.
68. exp "Disabled (Attitudes Toward)"/ or exp Disabilities/ or Physical Disorders/
69. Disabled Person?.ti,ab.
70. down syndrome.ti,ab.
71. down's syndrome/
72. drug abuse\$.ti,ab.
73. dyslexi\$.ti,ab.
74. exp drug abuse/
75. dyslexia/
76. exp epilepsy/
77. epilepsy.ti,ab.
78. epileptic?.ti,ab.
79. Migraine Headache/ or Headache/
80. headache?.ti,ab.
81. exp hearing disorders/
82. hearing impair\$.ti,ab.

83. exp heart disorders/
84. Human immunodeficiency virus.ti,ab.
85. exp hiv/
86. HIV.ti,ab.
87. Intellectual Development Disorder/ or Developmental Disabilities/
88. learning disabilit\$.ti,ab.
89. learning disorder?.ti,ab.
90. exp learning disorders/
91. exp learning disabilities/
92. exp mental disorders/
93. mental health/
94. mental\$ ill\$.ti,ab.
95. Mentally Disabled Person?.ti,ab.
96. migraine headache/
97. mobility issues.ti,ab.
98. mobility problem?.ti,ab.
99. Multiple Chronic Condition?.ti,ab.
100. multiple sclerosis.ti,ab.
101. multiple sclerosis/
102. musculoskeletal pain?.ti,ab.
103. neck pain?.ti,ab.
104. exp neoplasms/
105. exp nervous system disorders/
106. neurological disorder?.ti,ab.
107. obesity/
108. obesity.ti,ab.
109. obese.ti,ab.
110. osteoarthritis.ti,ab.

111. Pain/ and (chronic or persistent or recur\$.ti,ab.
112. Respiration Disorder?.ti,ab.
113. Sens\$ Disorder?.ti,ab.
114. spinal cord injur\$.ti,ab.
115. exp spinal cord injuries/
116. Substance Related Disorder?.ti,ab.
117. traumatic brain injur\$.ti,ab.
118. exp vision disorders/
119. visual\$ impair\$.ti,ab.
120. or/21-119
121. accessib\$.ti,ab.
122. assistive device?.ti,ab.
123. assistive tech\$.ti,ab.
124. career advice.ti,ab.
125. occupational guidance/
126. career counseling.ti,ab.
127. communication aid\$.ti,ab.
128. communication support\$.ti,ab.
129. co-operative education.ti,ab.
130. coach\$.ti,ab.
131. exp coaching/
132. coach\$.ti,ab.
133. (disclos\$ adj2 support\$.ti,ab.
134. (disability adj2 culture).ti,ab.
135. cross cultural differences/
136. "duty to accommodate".ti,ab.
137. Employee Performance Apprai\$.ti,ab.
138. (employment adj3 (ready or readiness)).ti,ab.

139. (employment adj3 equit\$).ti,ab.
140. (employment adj3 support\$).ti,ab.
141. (employment adj3 transition\$).ti,ab.
142. school to work transition/
143. supported employment/
144. employment policies.ti,ab.
145. employment policy.ti,ab.
146. employment program\$.ti,ab.
147. "accommodation (disabilities)"/
148. (flexib\$ adj2 work\$).ti,ab.
149. (flexib\$ adj2 hour?).ti,ab.
150. (flexib\$ adj2 shift\$).ti,ab.
151. graduation plan\$.ti,ab.
152. (government adj2 subsid\$).ti,ab.
153. Internship.ti,ab.
154. (intervention? adj5 (study or design)).ti,ab.
155. (interview\$ adj2 support\$).ti,ab.
156. (interview\$ adj2 mock).ti,ab.
157. mentor\$.ti,ab.
158. mentor/
159. (occupation\$ adj3 (ready or readiness)).ti,ab.
160. organi#ational policies.ti,ab.
161. organi#ational policy.ti,ab.
162. organizational climate/
163. policy making/
164. (peer? adj3 support\$).ti,ab.
165. (placement? adj5 (job? or occupation\$ or work\$)).ti,ab.
166. policies.ti,ab.



167. policy.ti,ab.
168. program\$.ti,ab.
169. government policy making/
170. exp vocational rehabilitation/
171. salary support?.ti,ab.
172. "school to work transition\$".ti,ab.
173. (school adj2 transition\$).ti,ab.
174. school to work transition/
175. Self-Evaluation Program?.ti,ab.
176. (sensitivity adj2 (training or education)).ti,ab.
177. service learning.ti,ab.
178. service learning/
179. skill? development.ti,ab.
180. skill learning/
181. social support/
182. social support?.ti,ab.
183. (support\$ adj3 transition\$).ti,ab.
184. training/
185. (training adj2 skill?).ti,ab.
186. (transition\$ adj2 (plan or plans or planning)).ti,ab.
187. (transition\$ adj2 practice?).ti,ab.
188. (transition\$ adj2 service?).ti,ab.
189. occupational guidance/
190. vocational guidance.ti,ab.
191. vocational readiness.ti,ab.
192. (work\$ adj3 accommodat\$).ti,ab.
193. (work\$ adj3 sociali#ation).ti,ab.
194. (work\$ adj3 transition\$).ti,ab.

195. (work\$ adj3 policies).ti,ab.
196. (work\$ adj3 policy).ti,ab.
197. or/121-196
198. career?.ti,ab.
199. earning?.ti,ab.
200. employment status/
201. employment.ti,ab.
202. employab\$.ti,ab.
203. supported employment/
204. enter\$ work\$.ti,ab.
205. (full-time adj2 (employ\$ or job? or work\$)).ti,ab.
206. (fulltime adj2 (job? or employ\$ or work\$)).ti,ab.
207. hired.ti,ab.
208. hiring.ti,ab.
209. labo?r force.ti,ab.
210. labo?r market.ti,ab.
211. labor market/
212. occupational outcome?.ti,ab.
213. occupational success/
214. (part-time adj2 (job? or employ\$ or work\$)).ti,ab.
215. (parttime adj2 (job? or employ\$ or work\$)).ti,ab.
216. precarious work\$.ti,ab.
217. exp employee benefits/ or salaries/
218. (secur\$ adj2 (job? or employ\$ or work\$)).ti,ab.
219. underemploy\$.ti,ab.
220. unemploy\$.ti,ab.
221. unemployment/
222. work\$ outcomes.ti,ab.

223. (work\$ adj3 transition\$).ti,ab.

224. (work\$ adj3 participat\$).ti,ab.

225. or/198-224

226. 20 and 120 and 197 and 225

227. limit 226 to (abstract collection or chapter or "column/opinion" or "comment/reply" or dissertation or editorial or letter or review-book or review-media or review-software & other)

228. 226 not 227

229. limit 228 to yr="2000 -Current"
